# Supplementary material
Source: PubMed Central journal article supplement (PMC6321749)
Supplement: NIHMS1509938-supplement-1.pdf [file NIHMS1509938-supplement-1.pdf]

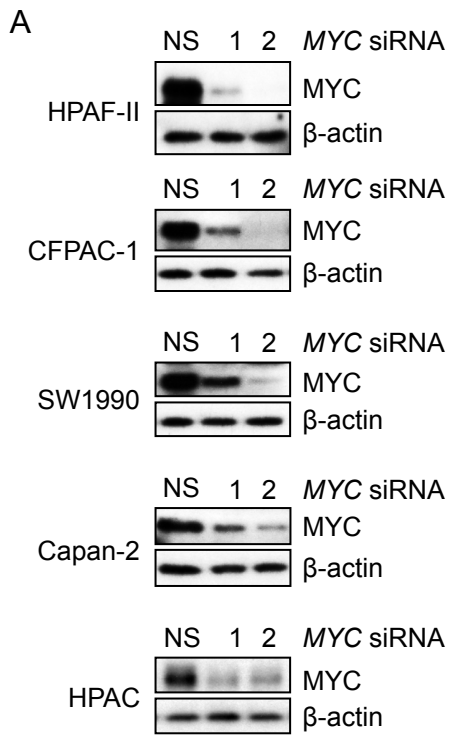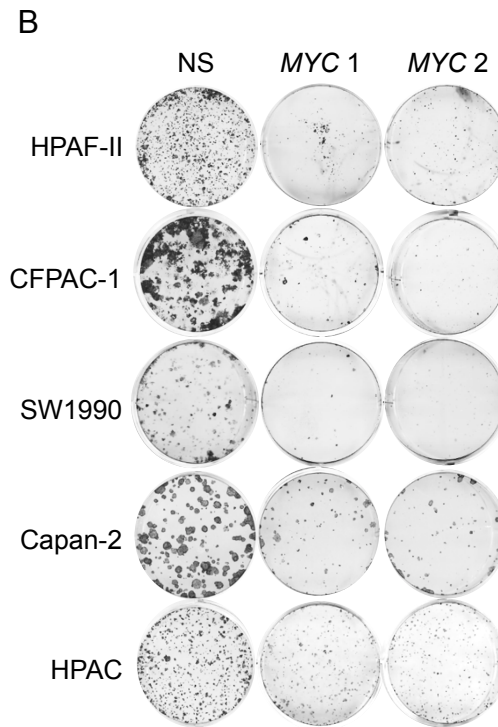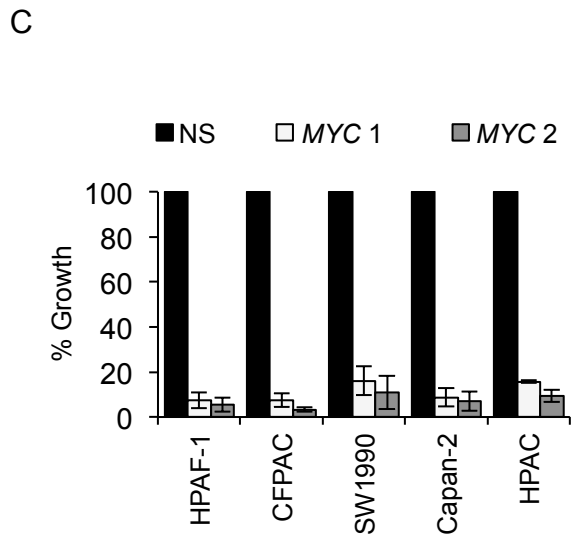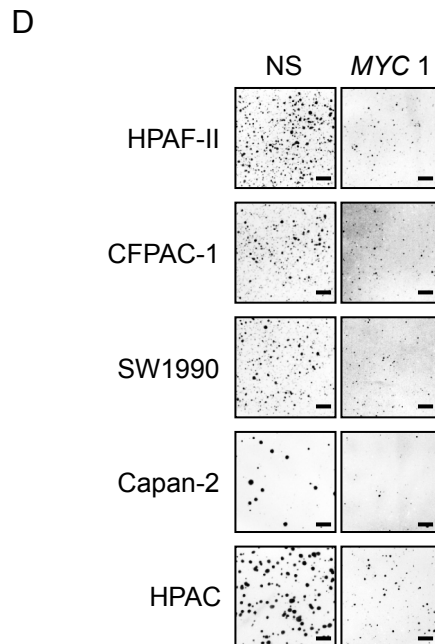

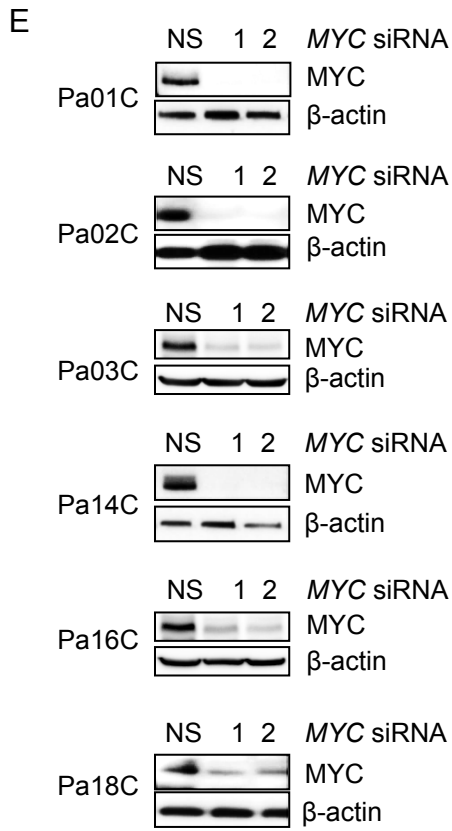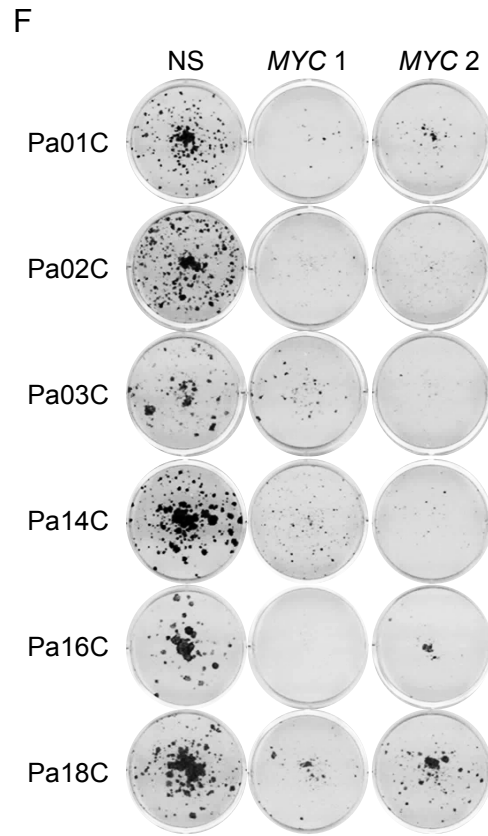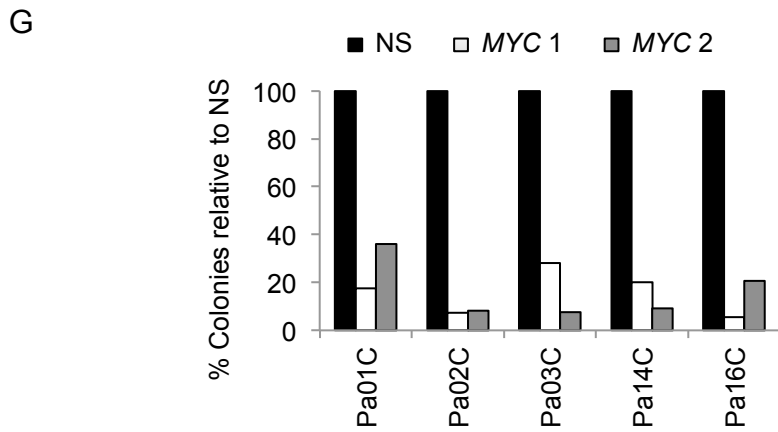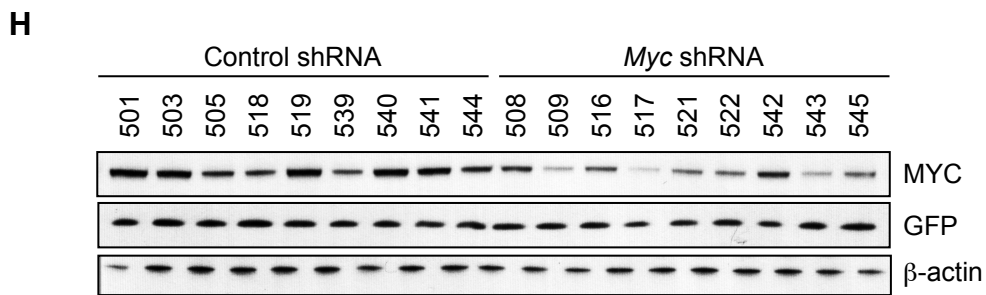

**Figure S1. MYC is Essential for PDAC Cell Growth, Related to Figure 1**

(A) *KRAS*-mutant PDAC cell lines were transfected with control nonspecific (NS) or siRNA oligos targeting two distinct *MYC* sequences to transiently suppress *MYC* expression (24 hr). Immunoblotting with anti-*MYC* antibody was done to monitor *MYC* levels and with anti- $\beta$ -actin antibody to verify equivalent loading of total cellular protein.

(B) Approximately 10 days after plating, representative 6 well plates were stained with crystal violet to visualize colonies of proliferating cells.

(C) Quantitation of data in panel B. The percentage of colony formation relative to NS was determined from three biological replicates for each cell line transfected with *MYC* siRNA. Data are presented as a mean of three replicates, error bars represent standard error of the mean.

(D) Soft agar colony formation was visualized by MTT viability staining 15 days after plating the indicated cell lines transfected with *MYC* siRNA. Scale bar = 1mm.

(E) *KRAS*-mutant PDX PDAC cell lines were transfected with control nonspecific (NS) or siRNA oligos targeting two distinct *MYC* sequences and immunoblotting was done as described in Figure S1A.

(F) Approximately 10 days after plating, representative 6 well plates were stained with crystal violet to visualize colonies of proliferating cells.

(G) Quantitation of data in panel F. Percentage of colony formation relative to NS.

(H) Immunoblotting for *MYC* expression of tumors from mice shown in Figure 1G that were harvested at ~40 days at time of sacrifice.

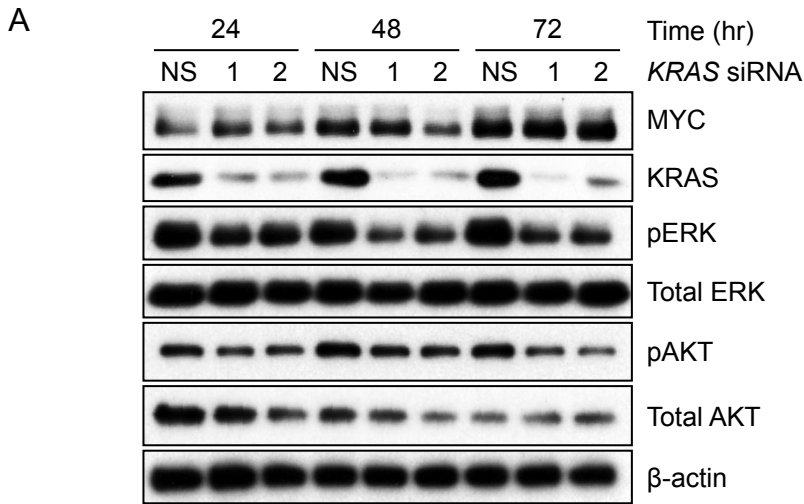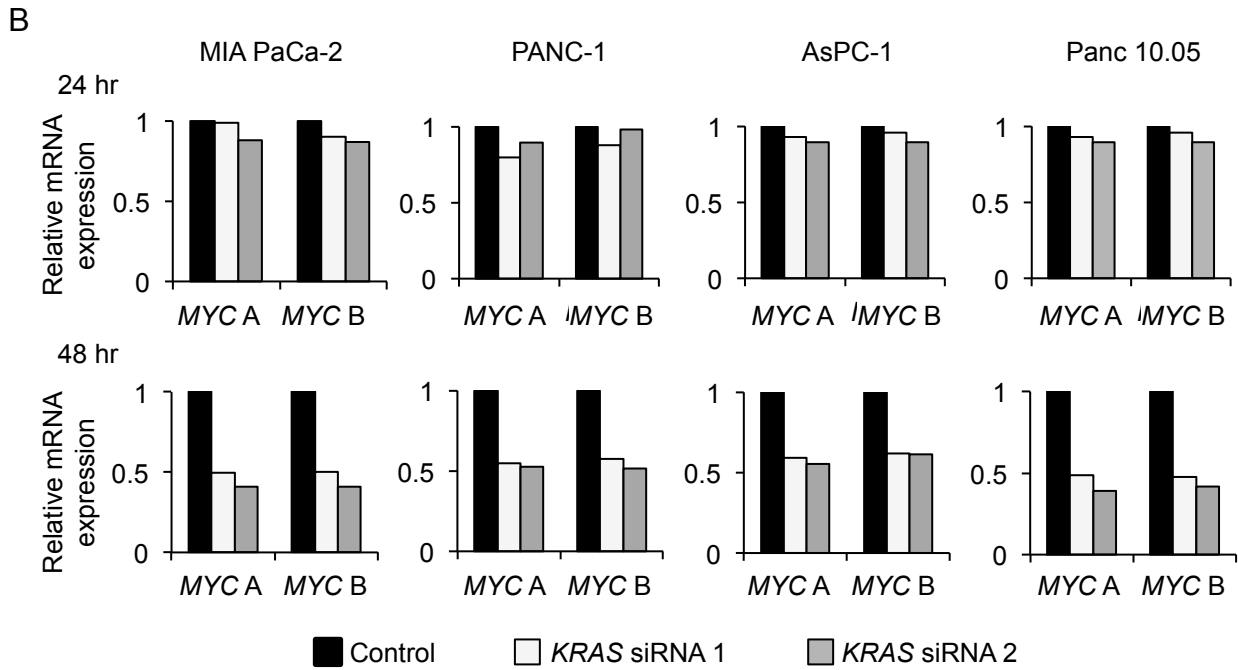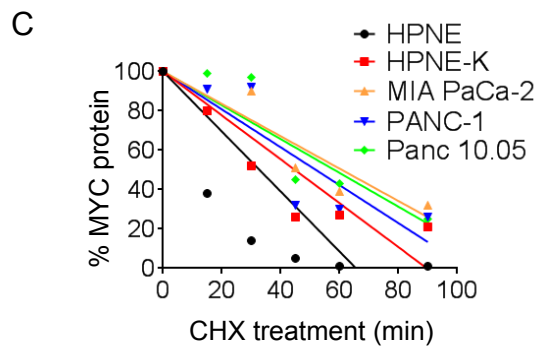



D

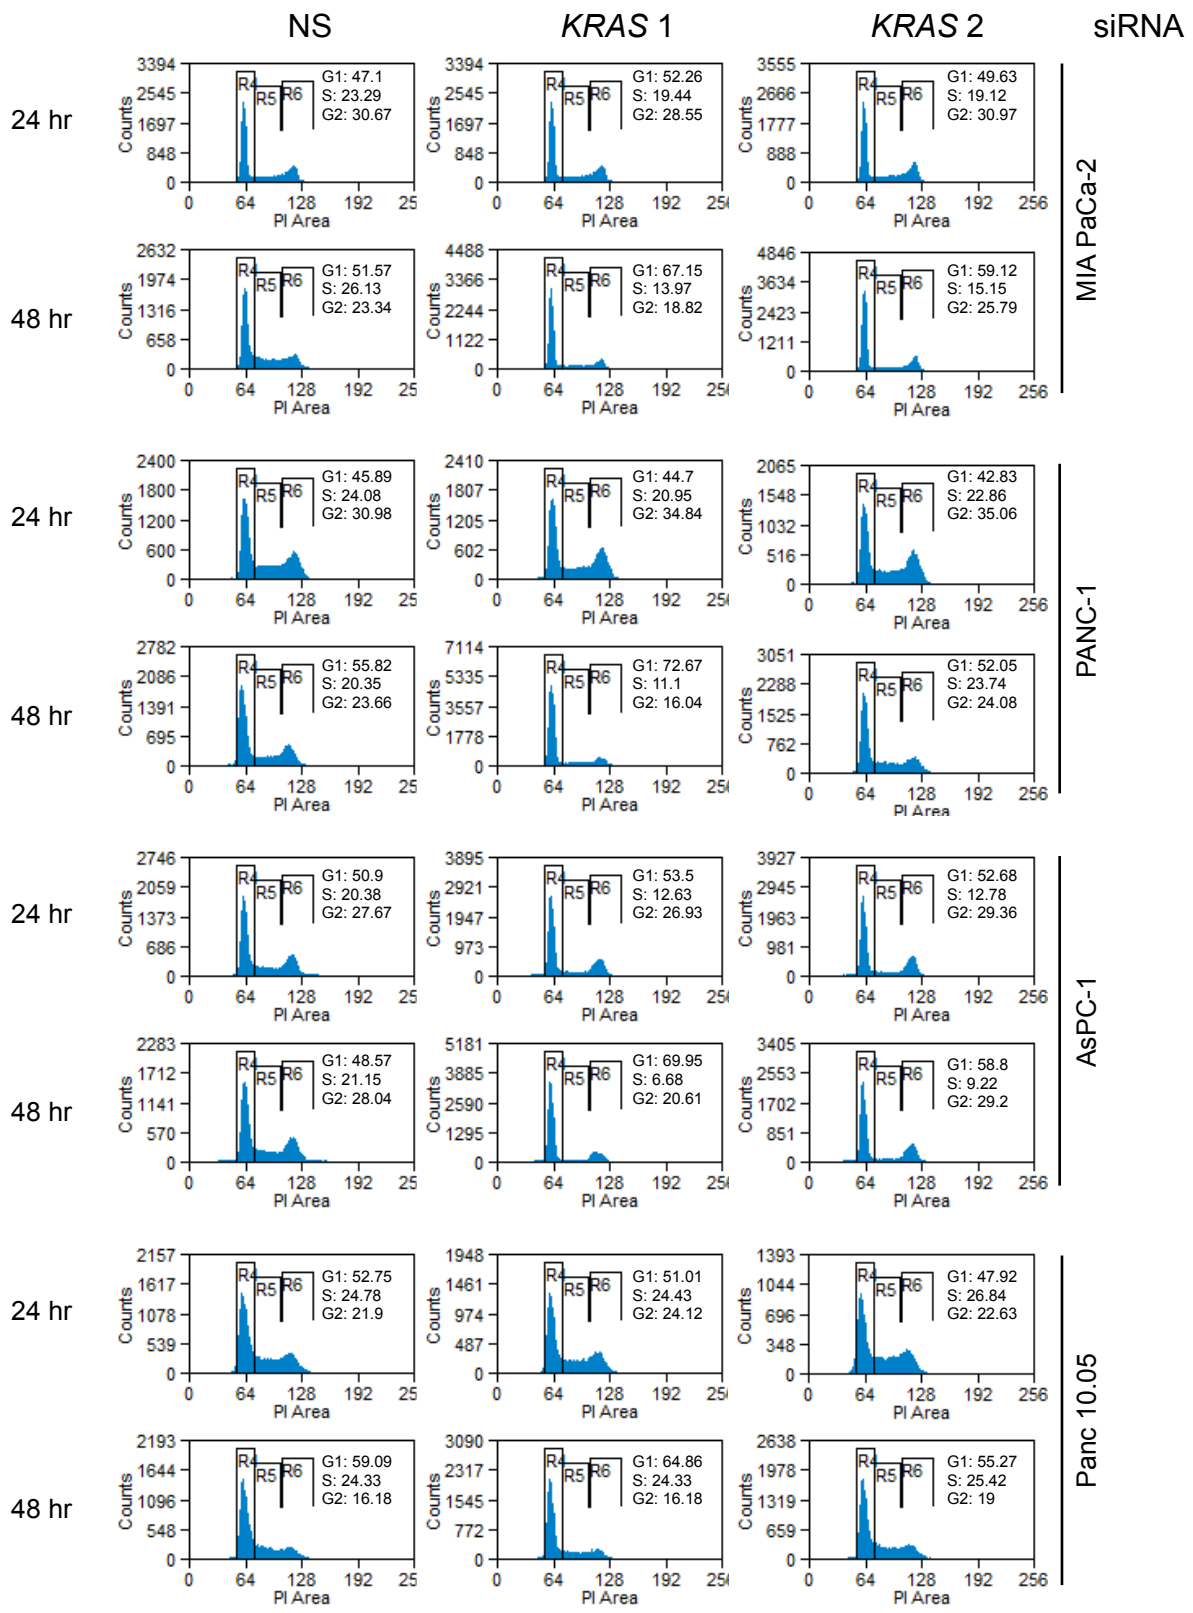

F

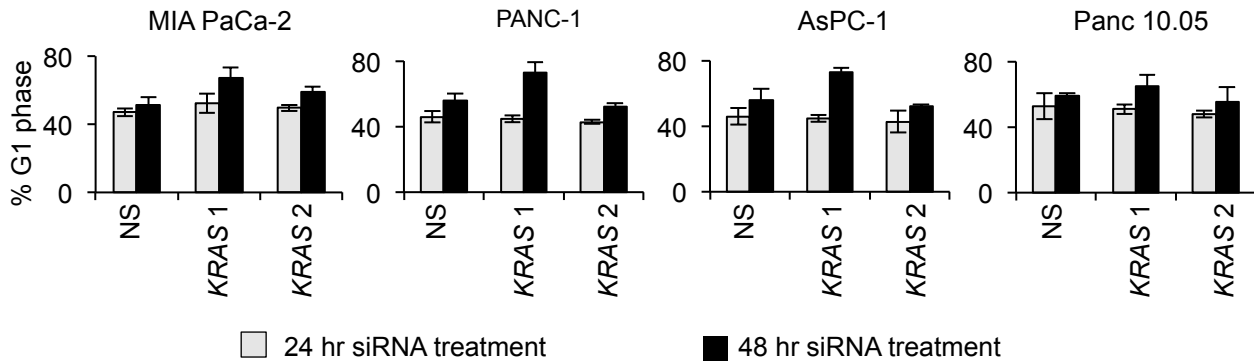

**Figure S2. KRAS Regulation of MYC Protein Expression, Related to Figure 2**

(A) KRAS WT BxPC-3 cells were transfected with NS or two independent *KRAS* (1 and 2) siRNAs. After the indicated times, the cultures were evaluated by immunoblotting to monitor changes in MYC and KRAS4B protein levels. Immunoblotting for phosphorylated and total ERK1/2 was done to verify loss of KRAS effector signaling, with  $\beta$ -actin done to verify equivalent loading of total protein.

(B) To measure *MYC* gene expression, the indicated PDAC cells were transfected with NS or *KRAS* siRNAs for 24 and 48 hr. RNA was extracted and following cDNA synthesis, real-time qPCR was performed using two sets of *MYC* specific primers (*MYC* A and *MYC* B). *MYC* mRNA expression levels were normalized to *GAPDH* mRNA levels.

(C) Linear regression graph showing quantitation of immunoblot data in panels 2F and S2C, for MYC protein remaining after initiation of CHX treatment (chase). Lower panel, MYC half-life in min ( $t_{1/2}$  (min)) was calculated for each cell line using GraphPad Prism.

(D) PDAC cell lines were transfected with NS or two independent *KRAS* siRNAs and cell cycle distribution was measured by propidium iodide staining at 24 or 48 hr post-transfection.

(E) Bar-graph summary of data in panel C. Data are presented as a mean of three biological replicates, error bars represent standard error of the mean.

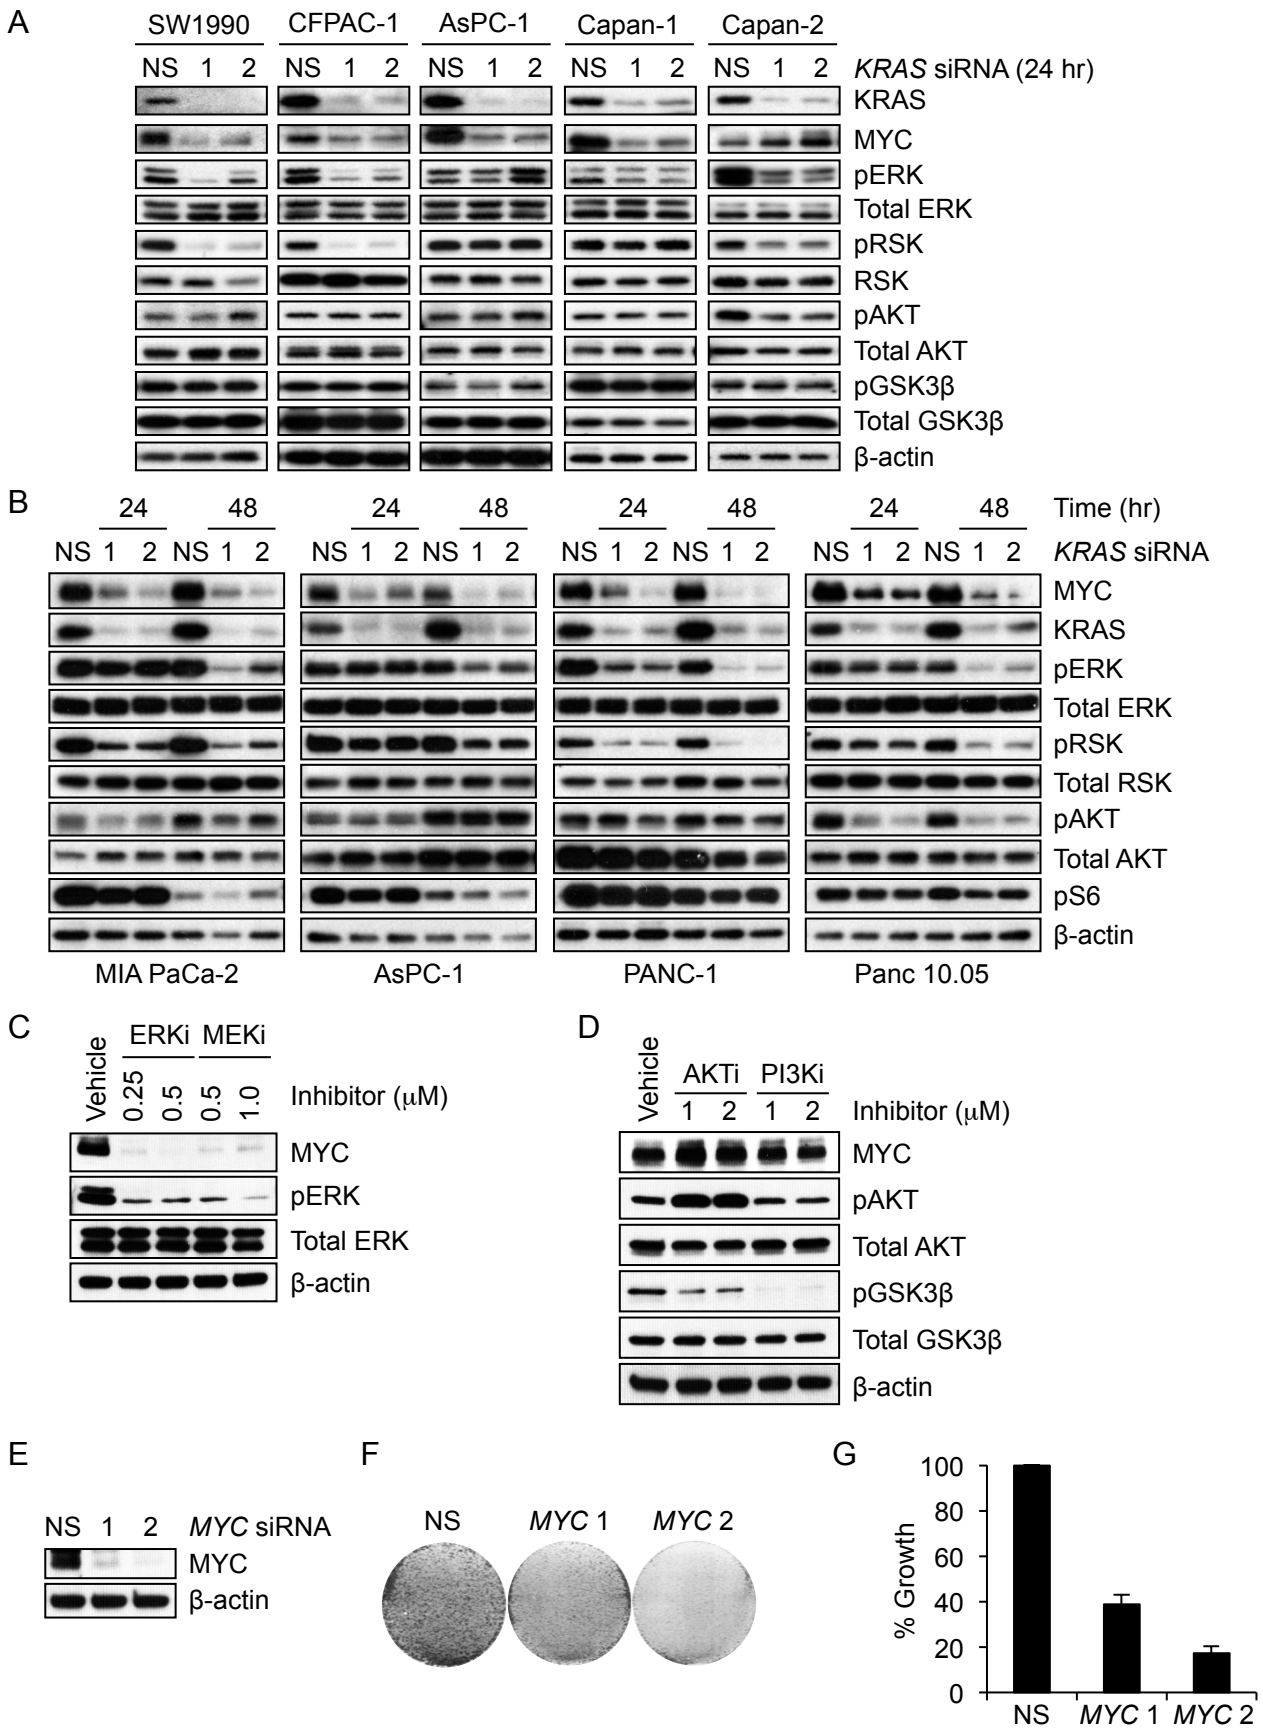

**Figure S3. KRAS Regulation of MYC Expression is Dependent on MEK-ERK1/2, but Not PI3K-AKT-GSK3 Signaling, Related to Figure 3**

(A) PDAC cell lines were transfected with NS or *KRAS* siRNA (24 hr). Immunoblotting of cell lysates was done to determine total *KRAS* and *MYC*, phosphorylated ERK1/2 (pERK) and its substrate p90RSK (pRSK), and phosphorylated AKT (pAKT) and its substrate GSK3 $\beta$  (pGSK3 $\beta$ ). Levels of total ERK, RSK, AKT and GSK3 $\beta$  were monitored to ascertain that changes in phosphorylated proteins were not due simply to changes in total proteins.

(B) PDAC cell lines were transfected with NS or *KRAS* siRNA for 24 or 48 hr. Immunoblotting of cell lysates were done to determine the levels of total *KRAS* or *MYC* and level of phosphorylated ERK1/2 (pERK), AKT (pAKT), p90RSK (pRSK), GSK-3 $\beta$  (pGSK-3 $\beta$ ).

(C) BxPC3 cells were treated with ERK1/2 inhibitor SCH772984 (ERKi) or MEK inhibitor AZD6244 (MEKi) for 24 hr and cell lysates were immunoblotted with the indicated antibodies.

(D) BxPC-3 cells were treated with AKT inhibitor AZD5363 (AKTi) or PI3K inhibitor AZD8186 (PI3Ki) for 24 hr and cell lysates were immunoblotted with the indicated antibodies.

(E) BxPC-3 cells were transiently transfected (24 hr) with NS or siRNA oligos targeting two distinct *MYC* sequences (1 and 2). Immunoblotting with anti-*MYC* antibody was done to monitor *MYC* levels and with anti- $\beta$ -actin antibody to verify equivalent loading of total cellular protein.

(F) Approximately 10 days after plating, representative plates from panel E were stained with crystal violet to visualize colonies of proliferating cells.

(G) Quantitation of data in panel F. The percentage of colony formation relative to NS was determined for BxPC-3 cells transfected with *MYC* siRNA. Data are presented as a mean of three biological replicates, error bars represent standard error of the mean.

**Table S1. MYC and Effector Activation in PDAC tumors, Related to Figure 3**

|                       |      |              | pAKT   | MYC     | pERK    |
|-----------------------|------|--------------|--------|---------|---------|
| <b>Spearman's rho</b> | pAKT | $r_s$        | 1.000  | 0.120   | -0.054  |
|                       |      | p (2-tailed) |        | 0.193   | 0.556   |
|                       | MYC  | $r_s$        | 0.120  | 1.000   | 0.485** |
|                       |      | p (2-tailed) | 0.193  |         | <0.0001 |
|                       | pERK | $r_s$        | -0.054 | 0.485** | 1.000   |
|                       |      | p (2-tailed) | 0.556  | <0.0001 |         |

\*\*Correlation is significant at the 0.01 level (2-tailed)

A

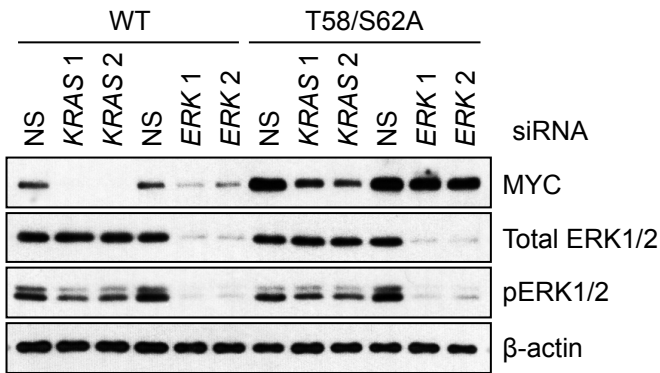

B

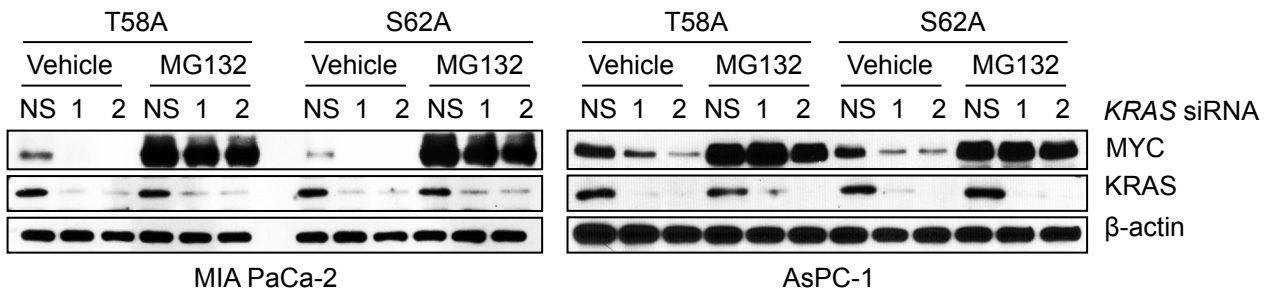

Figure S4. KRAS Regulates MYC Protein Stability Independently of MYC Residues T58 and S62, Related to Figure 4

(A) MIA PaCa-2 cells stably expressing FLAG epitope-tagged WT or phospho-deficient mutants of MYC (T58A, S62A, T58/S62A) were transiently transfected with NS or siRNA targeting KRAS or ERK1/2. After 24 hr, cell lysates were immunoblotted with the indicated antibodies.

(B) PDAC cell lines stably expressing FLAG epitope-tagged phospho-deficient MYC were transiently transfected with control NS siRNA or siRNA oligos targeting *KRAS* (1 and 2) for 20 hr. After treatment with vehicle control (DMSO) or 5  $\mu$ M proteasome inhibitor MG132 for an additional 6 hr, cell lysates were immunoblotted with the indicated antibodies.

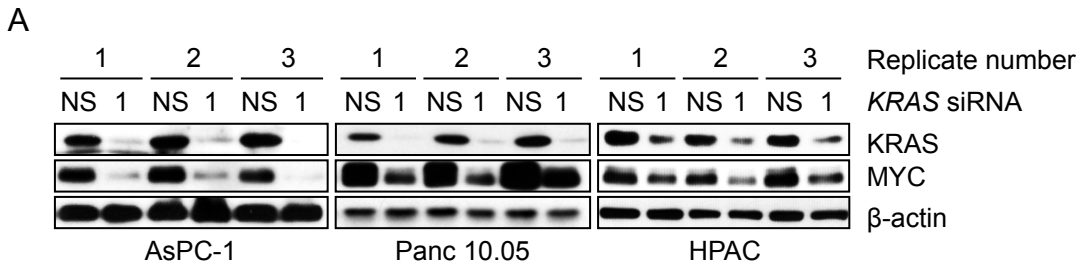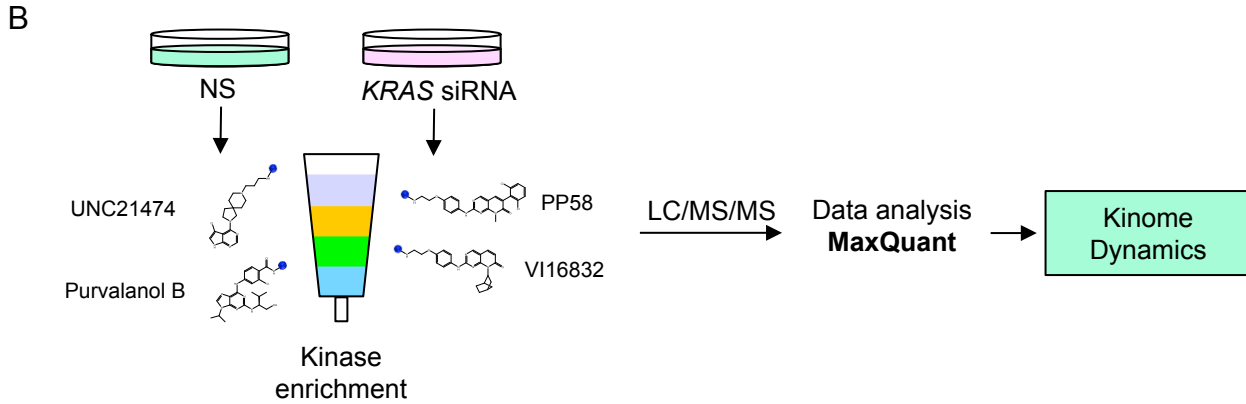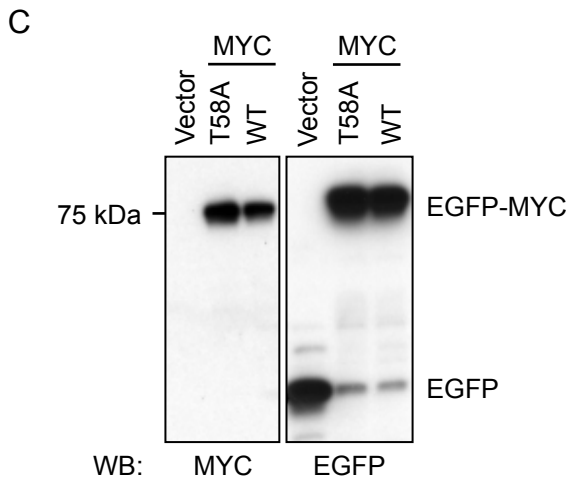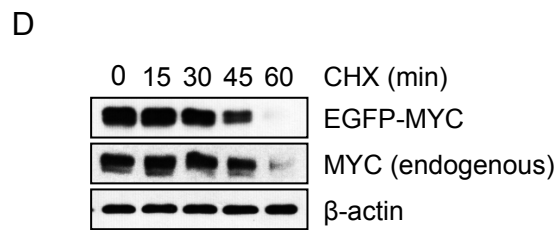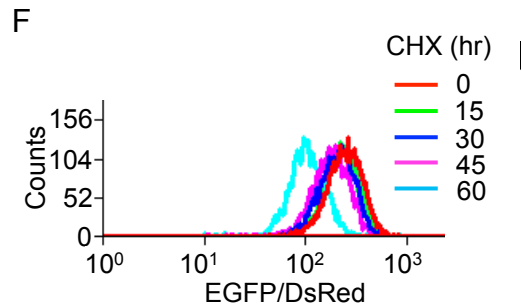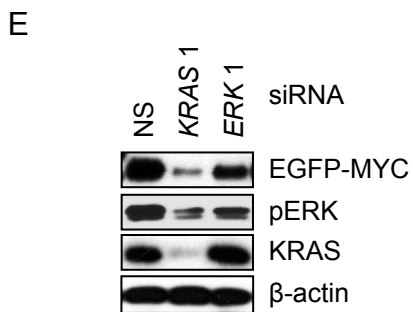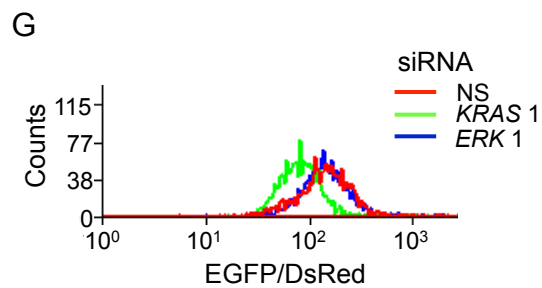

**Figure S5. Assays to Identify Protein Kinases that Regulate MYC Protein Degradation, Related to Figure 5**

(A) Immunoblot of three biological replicate samples of PDAC cells used for multiplexed inhibitor beads (MIB)/mass spectroscopy (MS) analysis in Figure 5B. Lysates from cells transfected with NS or *KRAS* siRNA for 24 hr were immunoblotted to verify loss of *KRAS* and *MYC*, then subjected to MIB/MS analysis.

(B) Workflow of MIB/MS analysis to profile kinome dynamics upon *KRAS* knockdown in PDAC cells. Total cell lysates were prepared from PDAC cells transfected with NS or *KRAS* siRNA for 24 hr, then subjected to affinity capture of endogenous kinases, followed by quantitative mass spectrometry to measure kinome activity profiles.

(C) Cell lysates from MIA PaCa-2 cells stably expressing GPS-MYC reporter were used for immunoblotting with anti-MYC or GFP antibodies.

(D) MIA PaCa-2 cells stably expressing GPS-MYC were treated with CHX for the indicated times. Cell lysates were then immunoblotted with anti-MYC antibody.

(E) MIA PaCa-2 cells stably expressing GPS-MYC were transfected with NS or siRNA targeting *KRAS* or *ERK1/2* for 24 hr and cell lysates were immunoblotted with anti-MYC antibody.

(F) EGFP/dsRed ratio histograms of MIA PaCa-2 cells stably expressing GPS-MYC, treated with CHX for the indicated times. EGFP and DsRed fluorescence was measured by FACS. Data were plotted using Summit 5.2.

(G) MIA PaCa-2 cells stably expressing GPS-MYC were transiently transfected with NS or siRNA targeting *KRAS* or *ERK1/2*. After 24 hr EGFP and DsRed fluorescence was measured by FACS to generate the EGFP/DsRed ratio histograms. Data were plotted using Summit 5.2.

A

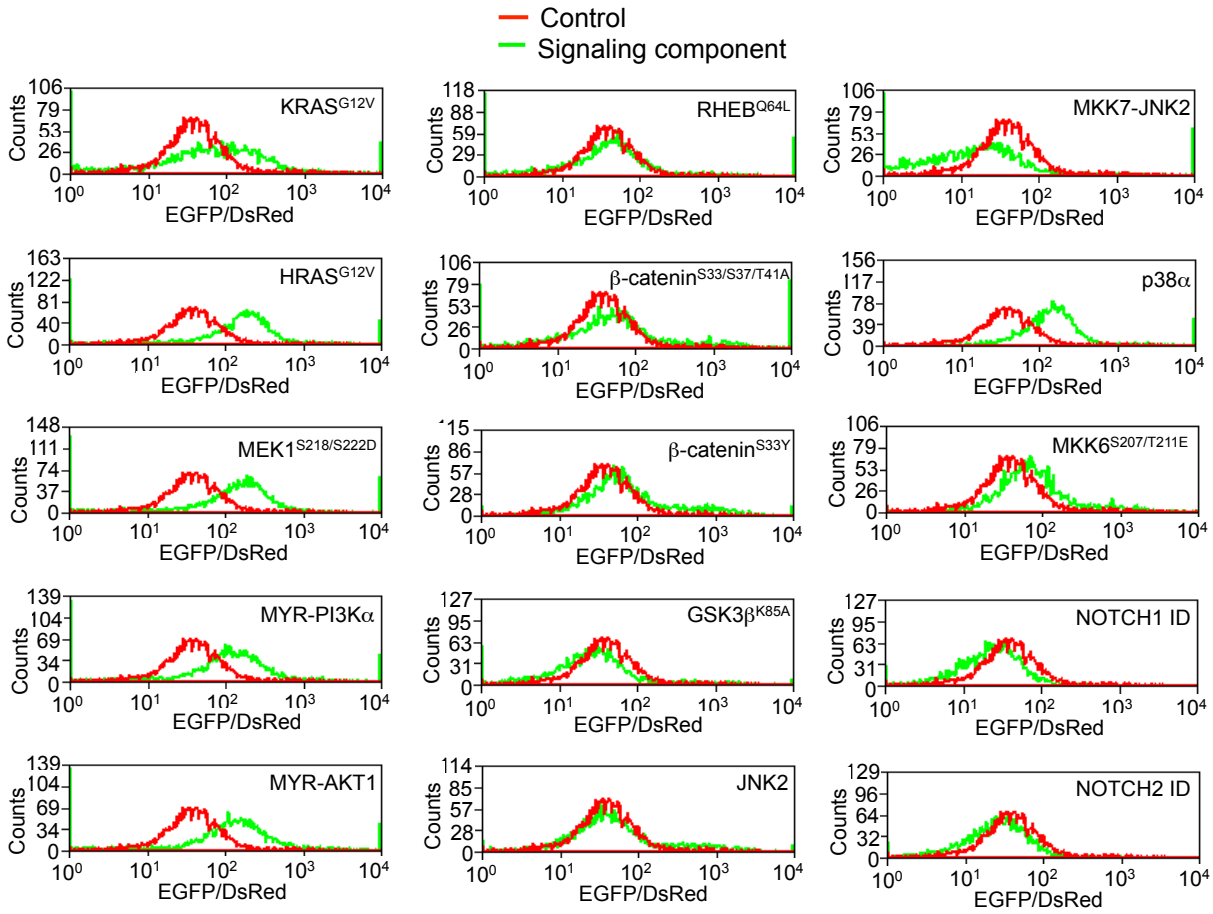

B

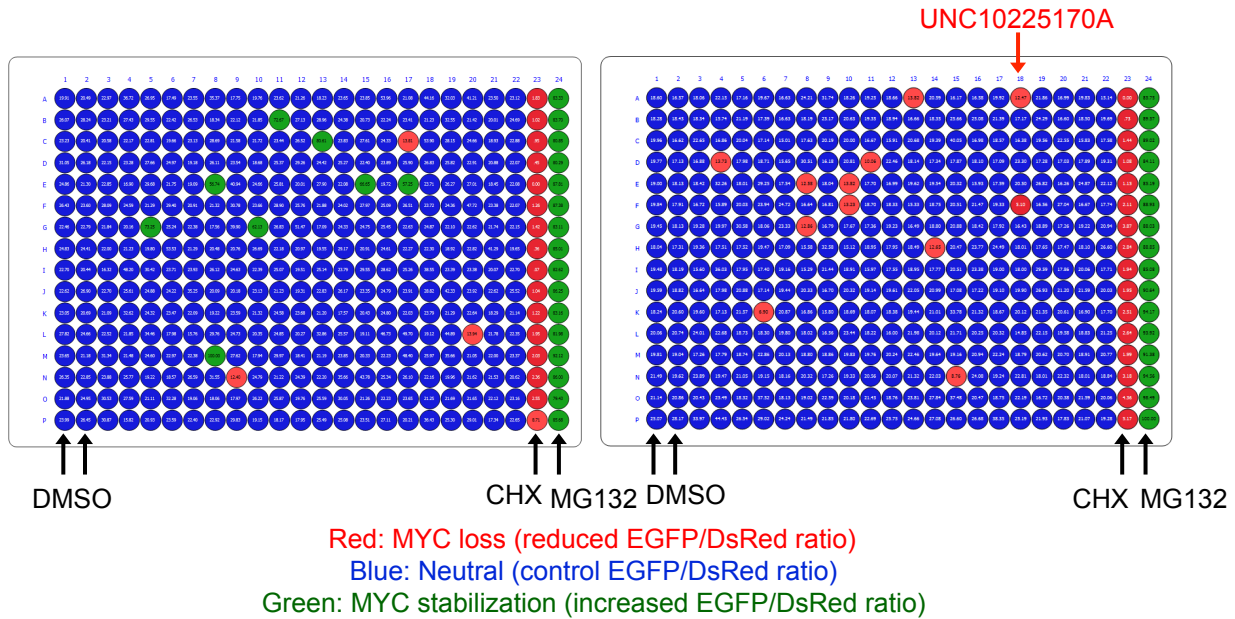

C

| Protein | Kd (nM) |
|---------|---------|
| MEK5    | 11      |
| MEK1    | 100     |
| MEK2    | 270     |
| RIPK2   | 440     |



Figure S6. Identification of Regulators of MYC Protein Stability, Related to Figure 6

(A) MIA PaCa-2 cells stably expressing GPS-MYC were infected with control (red) or lentivirus expression vectors encoding the indicated protein (green). EGFP and DsRed fluorescence was measured by FACS to generate the EGFP/DsRed ratio histograms. Data were plotted using Summit 5.2.

(B) EGFP/DsRed ratio heat maps of 384-well plates from a high-throughput flow-cytometry-based screen with the Published Kinase Inhibitor Set (PKIS) of 843 compounds. MIA PaCa-2 cells stably expressing GPS-MYC were plated in 384-well plates using robotic liquid handling, next day washed and treated with PKIS for 4 hr and analyzed with Intellicyte iQue high throughput flow cytometer. Shown are heat maps of two plates treated with two different sets of PKIS. Treatment with vehicle (DMSO), MG132 (increased GPS-MYC expression) and CHX (decreased GPS-MYC expression) treatments served as internal controls.

(C) UNC10225170A activity against the top kinases from a total of 392 wild-type human kinases evaluated. Compiled from Supplementary Table 3 (Drewry et al., 2017).

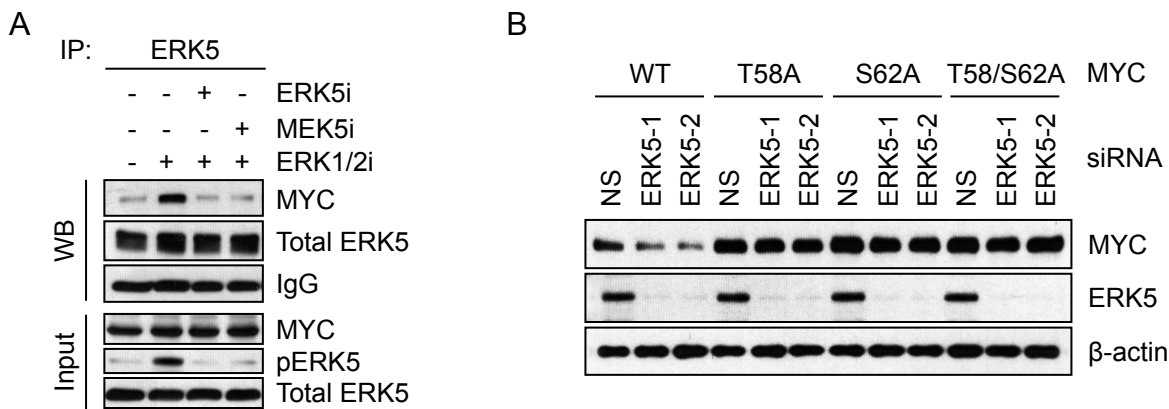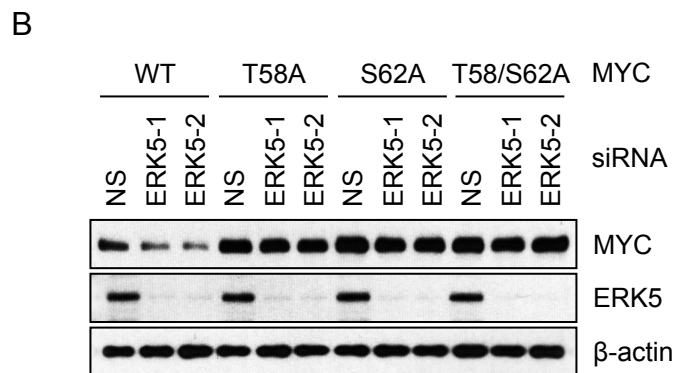

**C**

SCH772984 (hr; 1  $\mu$ M)

0 2 4 8 12 24 48

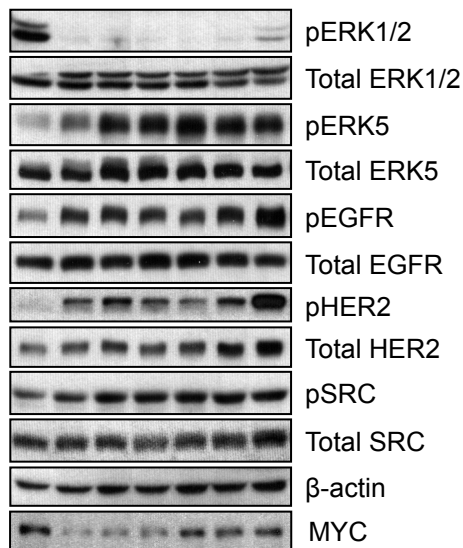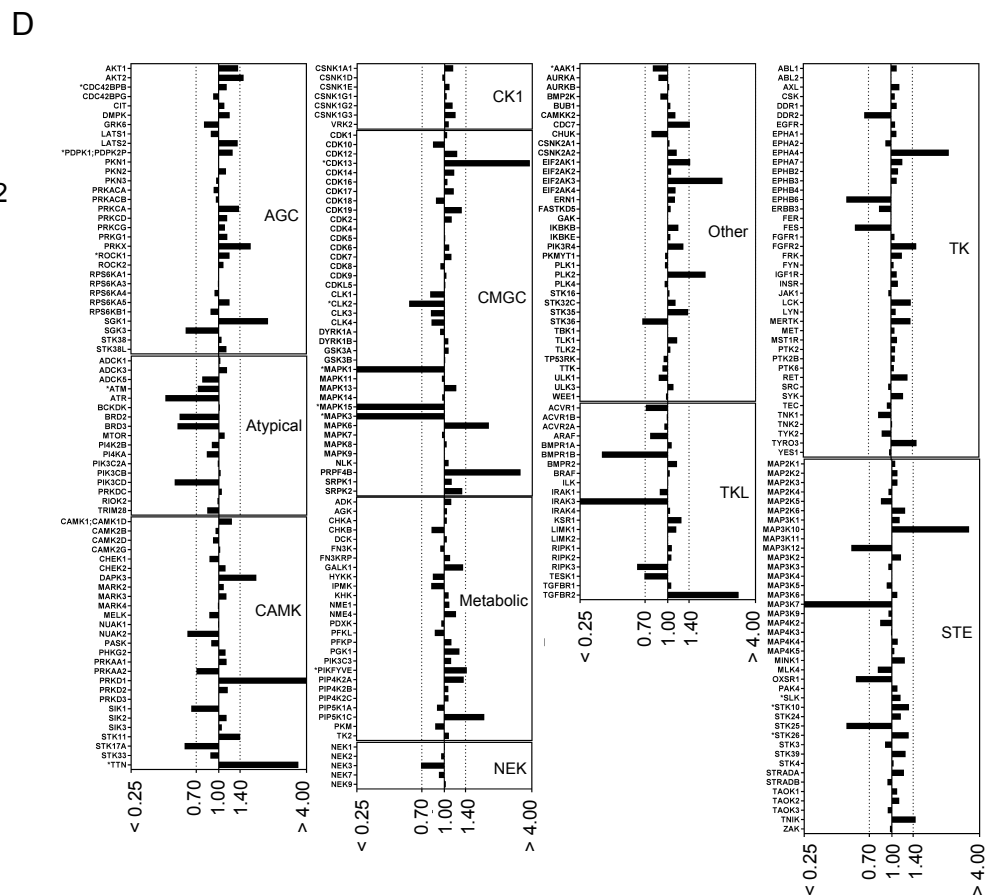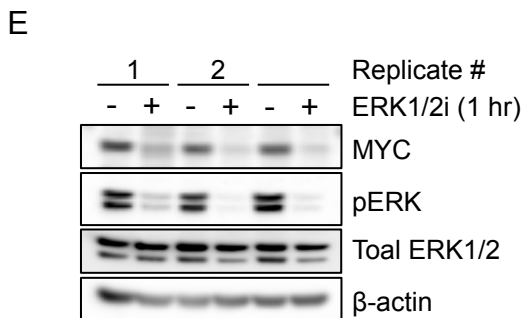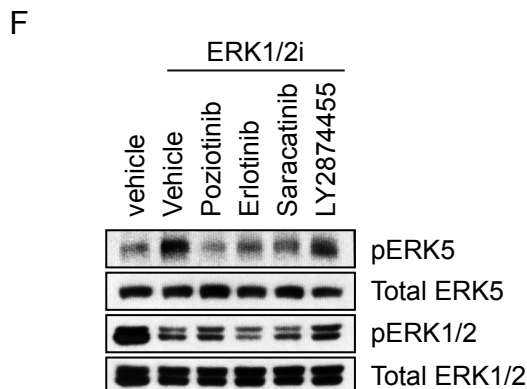

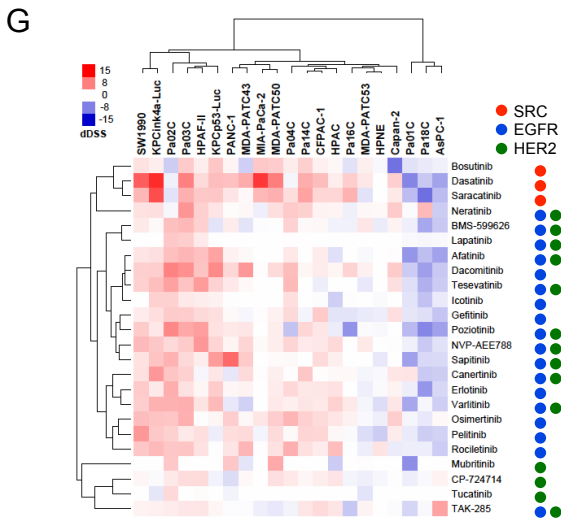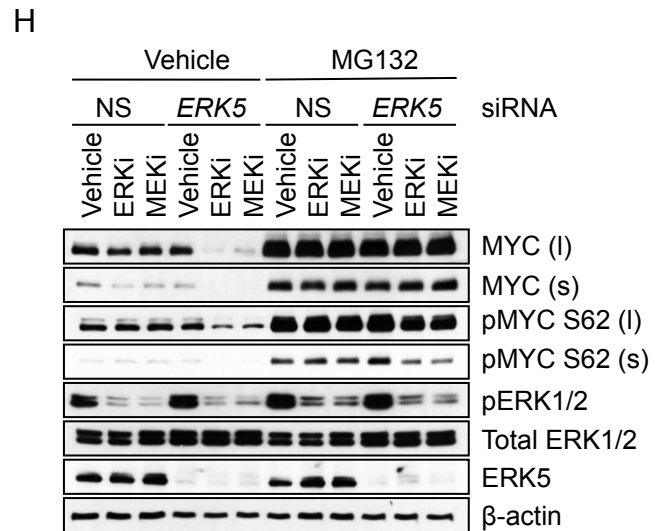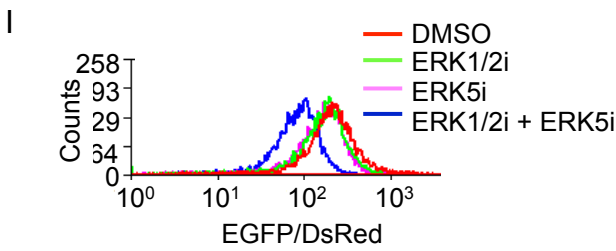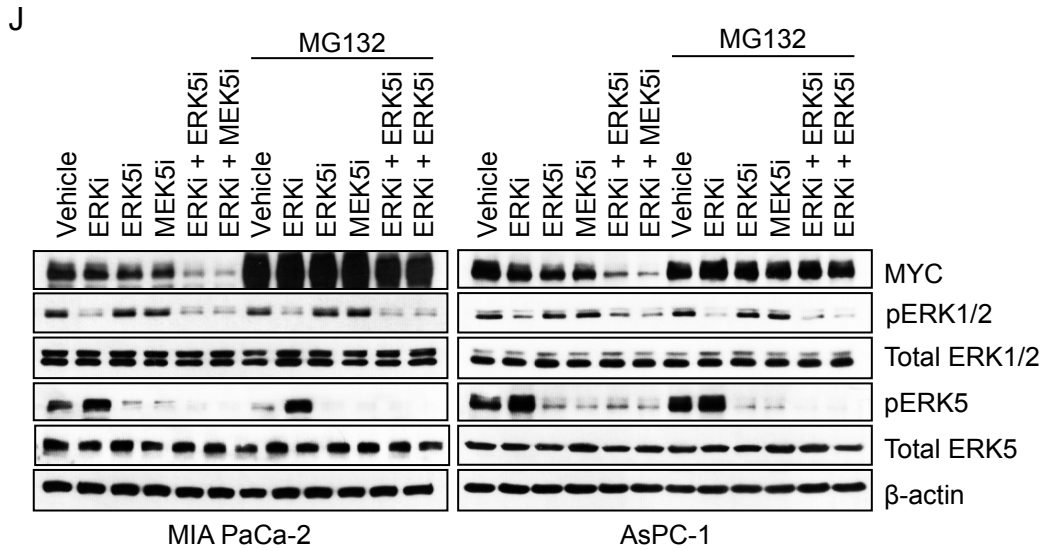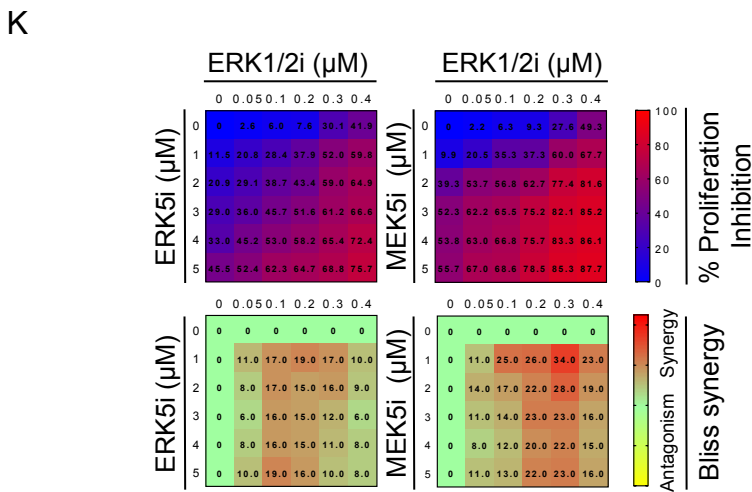

L

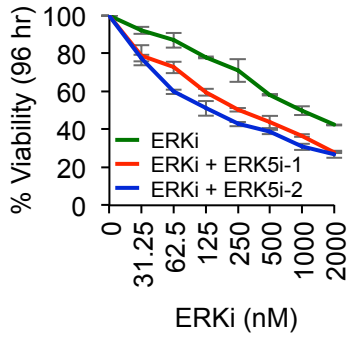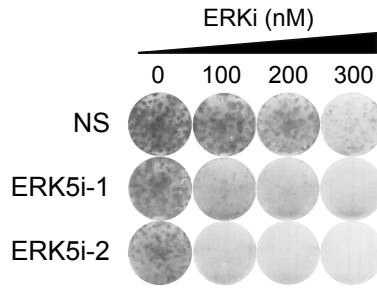

| MIA PaCa-2     |                       |
|----------------|-----------------------|
| Treatment      | GI <sub>50</sub> (μM) |
| ERKi           | >2                    |
| ERKi + ERK5i-1 | 0.1                   |
| ERKi + ERK5i-2 | 0.08                  |

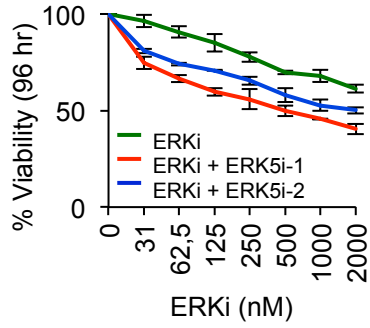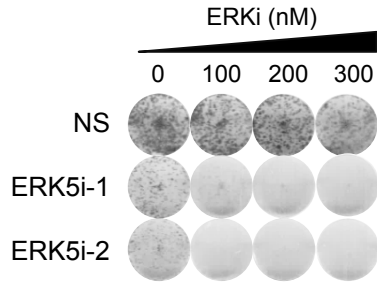

| AsPC-1         |                       |
|----------------|-----------------------|
| Treatment      | GI <sub>50</sub> (μM) |
| ERKi           | >2                    |
| ERKi + ERK5i-1 | 0.5                   |
| ERKi + ERK5i-2 | 0.7                   |

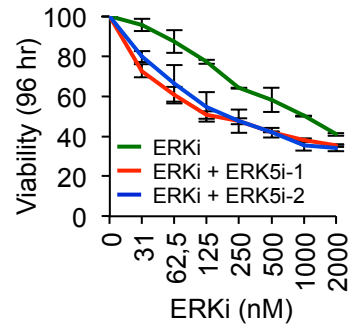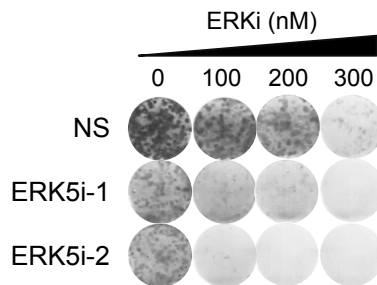

| Panc 10.05     |                       |
|----------------|-----------------------|
| Treatment      | GI <sub>50</sub> (μM) |
| ERKi           | 0.8                   |
| ERKi + ERK5i-1 | 0.09                  |
| ERKi + ERK5i-2 | 0.089                 |

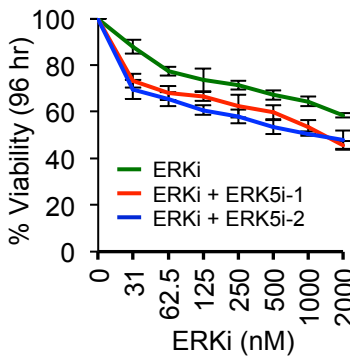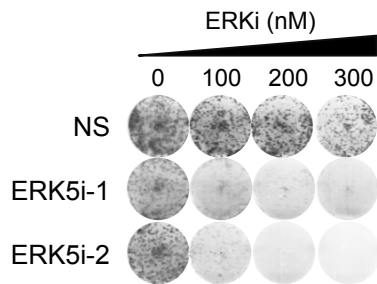

| SW1990         |                       |
|----------------|-----------------------|
| Treatment      | GI <sub>50</sub> (μM) |
| ERKi           | >2                    |
| ERKi + ERK5i-1 | 1                     |
| ERKi + ERK5i-2 | 0.21                  |

M

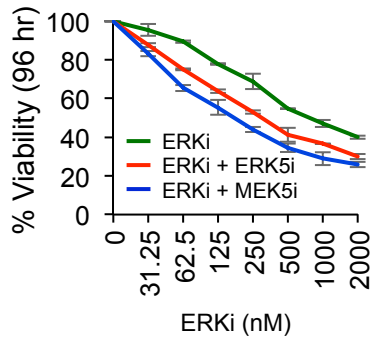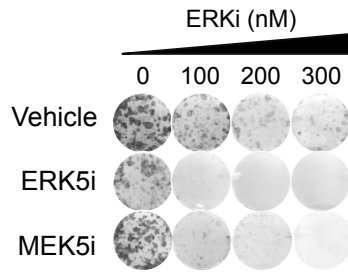

| MIA PaCa-2   |                       |
|--------------|-----------------------|
| Treatment    | GI <sub>50</sub> (μM) |
| ERKi         | >2                    |
| ERKi + ERK5i | 0.47                  |
| ERKi + MEK5i | 0.21                  |

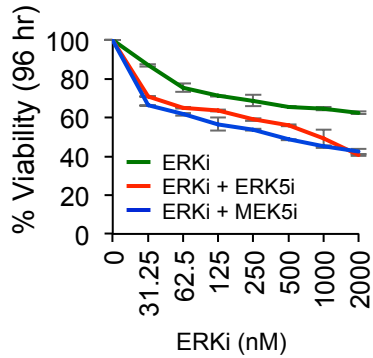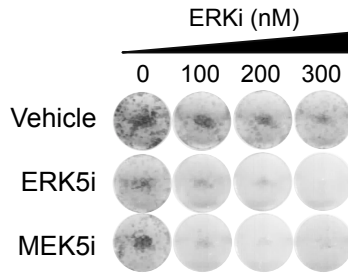

| AsPC-1       |                       |
|--------------|-----------------------|
| Treatment    | GI <sub>50</sub> (μM) |
| ERKi         | >2                    |
| ERKi + ERK5i | >2                    |
| ERKi + MEK5i | 0.2                   |

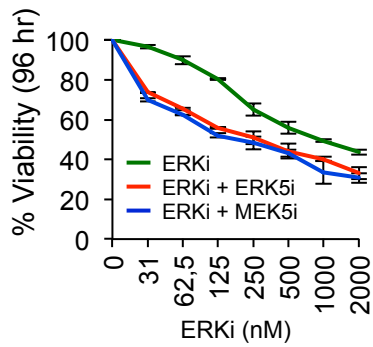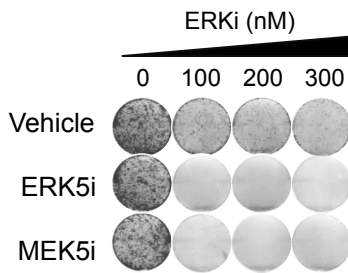

| Panc 10.05   |                       |
|--------------|-----------------------|
| Treatment    | GI <sub>50</sub> (μM) |
| ERKi         | 0.8                   |
| ERKi + ERK5i | 0.28                  |
| ERKi + MEK5i | 0.23                  |

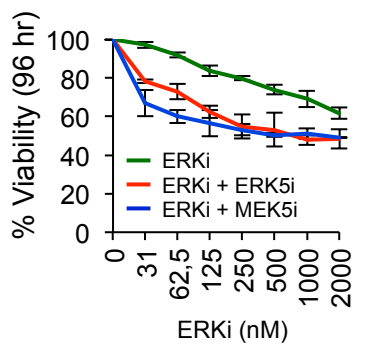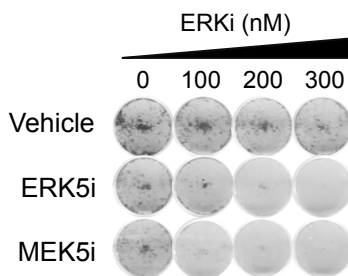

| SW1990       |                       |
|--------------|-----------------------|
| Treatment    | GI <sub>50</sub> (μM) |
| ERKi         | >2                    |
| ERKi + ERK5i | 0.08                  |
| ERKi + MEK5i | >2                    |

N

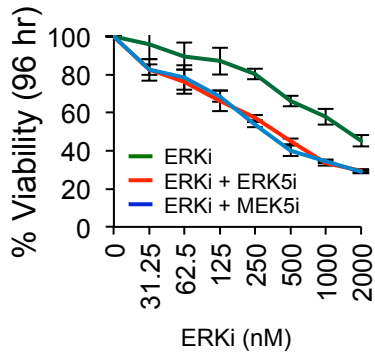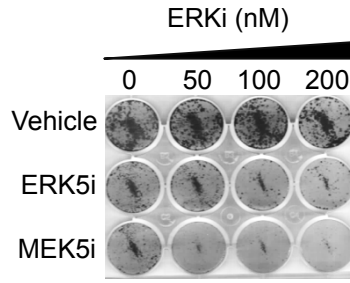

| MIA PaCa-2 (Empty vector) |                       |
|---------------------------|-----------------------|
| Treatment                 | GI <sub>50</sub> (μM) |
| ERKi                      | >2                    |
| ERKi + ERK5i              | 0.12                  |
| ERKi + MEK5i              | 0.082                 |

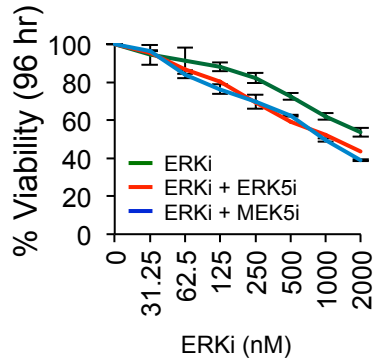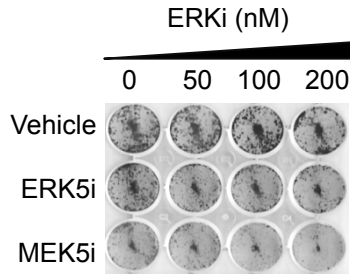

| MIA PaCa-2 (MYC WT) |                       |
|---------------------|-----------------------|
| Treatment           | GI <sub>50</sub> (μM) |
| ERKi                | >2                    |
| ERKi + ERK5i        | >2                    |
| ERKi + MEK5i        | 0.09                  |

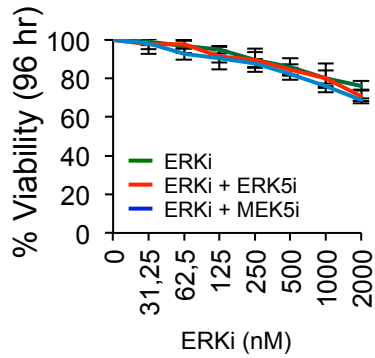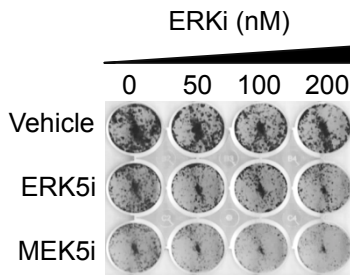

| MIA PaCa-2 (MYC S62A) |                       |
|-----------------------|-----------------------|
| Treatment             | GI <sub>50</sub> (μM) |
| ERKi                  | >2                    |
| ERKi + ERK5i          | >2                    |
| ERKi + MEK5i          | >2                    |

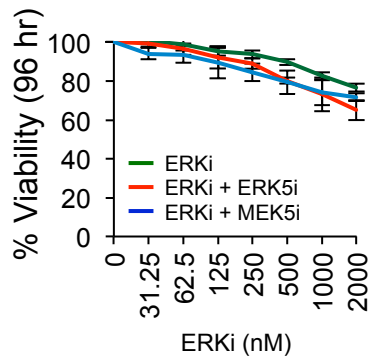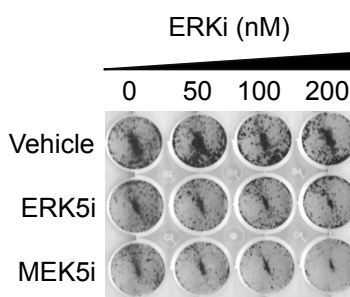

| MIA PaCa-2 (MYC T58A) |                       |
|-----------------------|-----------------------|
| Treatment             | GI <sub>50</sub> (μM) |
| ERKi                  | >2                    |
| ERKi + ERK5i          | >2                    |
| ERKi + MEK5i          | >2                    |

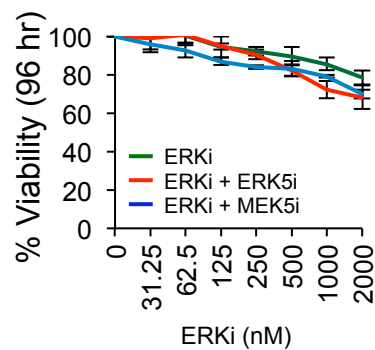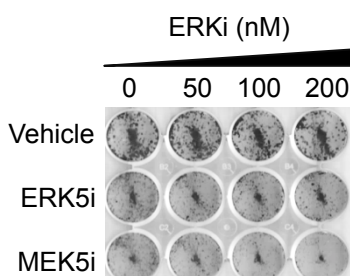

| MIA PaCa-2 (MYC T58/S62A) |                       |
|---------------------------|-----------------------|
| Treatment                 | GI <sub>50</sub> (μM) |
| ERKi                      | >2                    |
| ERKi + ERK5i              | 1.17                  |
| ERKi + MEK5i              | 0.13                  |

O

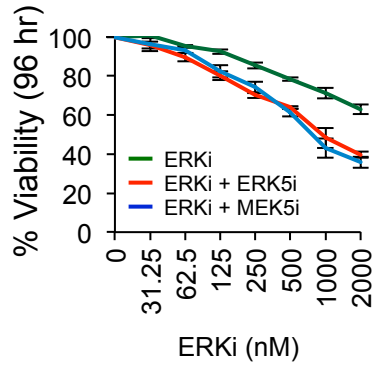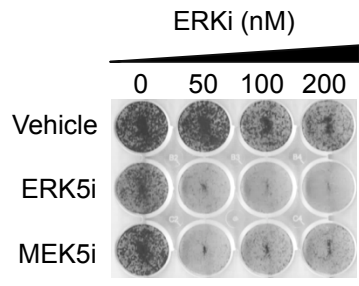

| AsPC-1 (Empty vector) |                       |
|-----------------------|-----------------------|
| Treatment             | GI <sub>50</sub> (μM) |
| ERKi                  | >2                    |
| ERKi + ERK5i          | 0.46                  |
| ERKi + MEK5i          | 0.38                  |

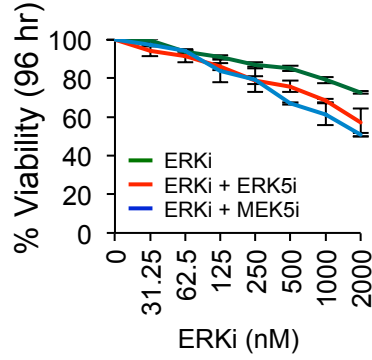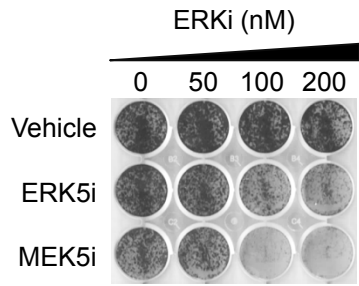

| AsPC-1 (MYC WT) |                       |
|-----------------|-----------------------|
| Treatment       | GI <sub>50</sub> (μM) |
| ERKi            | >2                    |
| ERKi + ERK5i    | >2                    |
| ERKi + MEK5i    | 0.70                  |

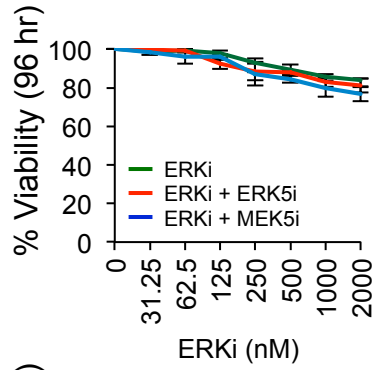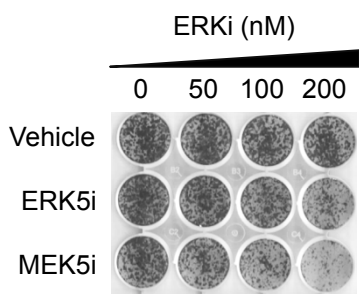

| AsPC-1 (MYC S62A) |                       |
|-------------------|-----------------------|
| Treatment         | GI <sub>50</sub> (μM) |
| ERKi              | >2                    |
| ERKi + ERK5i      | >2                    |
| ERKi + MEK5i      | >2                    |

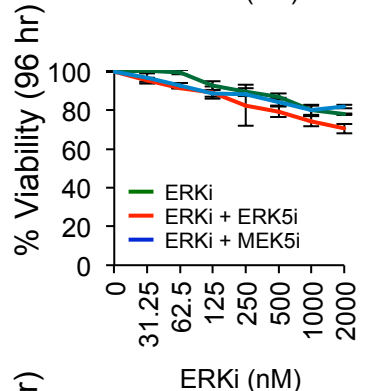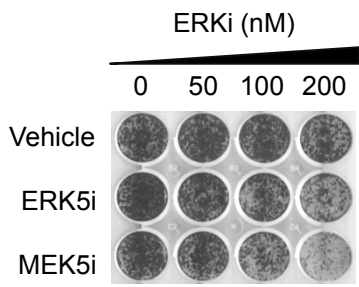

| AsPC-1 (MYC T58A) |                       |
|-------------------|-----------------------|
| Treatment         | GI <sub>50</sub> (μM) |
| ERKi              | >2                    |
| ERKi + ERK5i      | >2                    |
| ERKi + MEK5i      | >2                    |

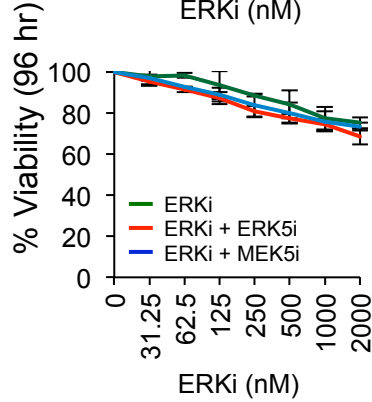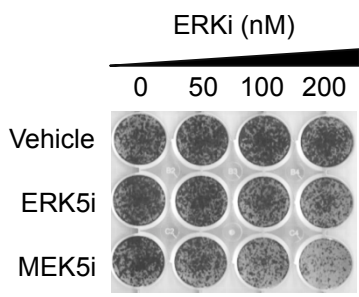

| ASPC-1 (MYC S62A/T58A) |                       |
|------------------------|-----------------------|
| Treatment              | GI <sub>50</sub> (μM) |
| ERKi                   | >2                    |
| ERKi + ERK5i           | >2                    |
| ERKi + MEK5i           | >2                    |



P

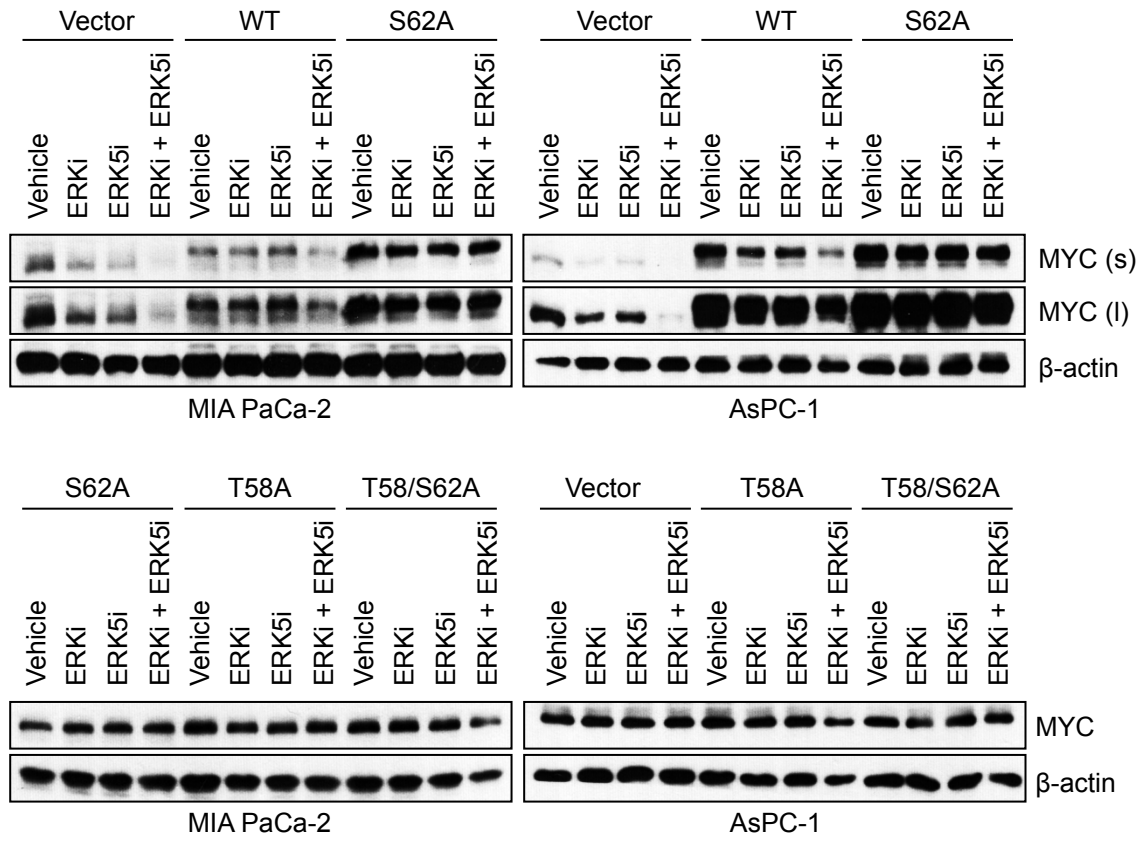

Q

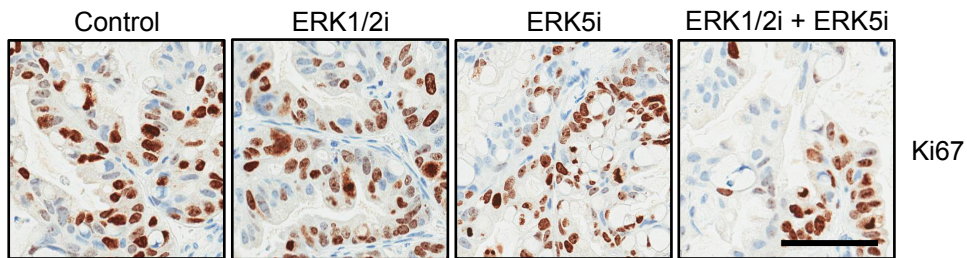



R

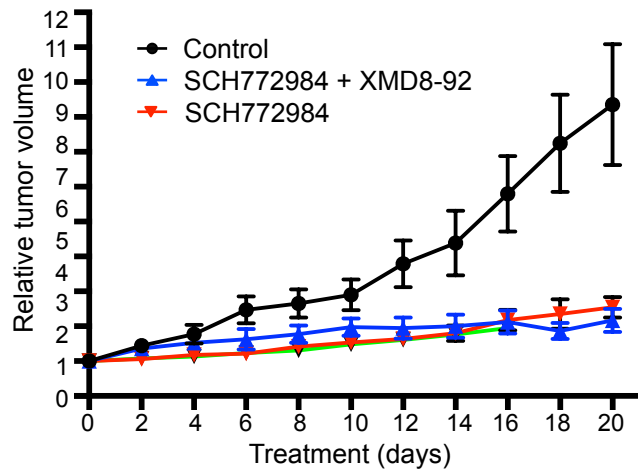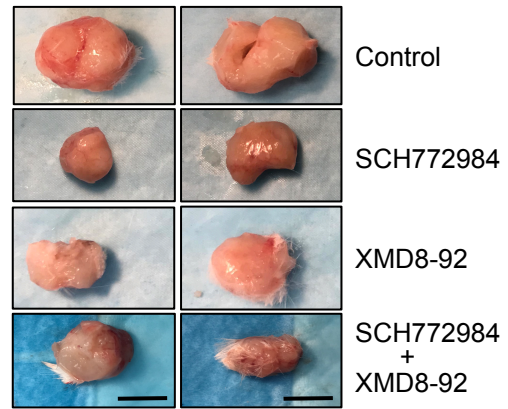

S

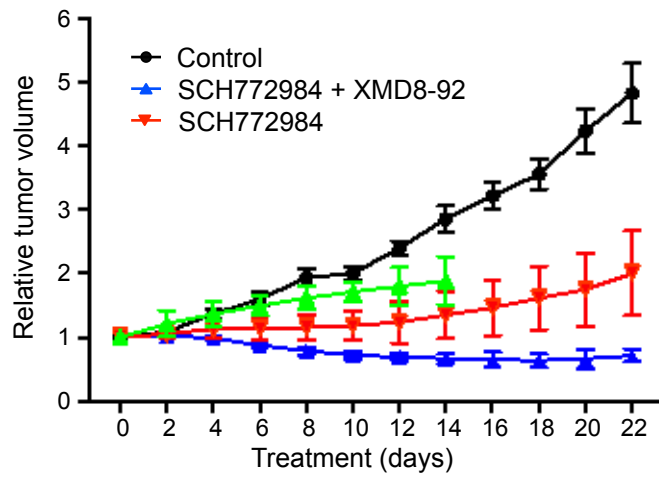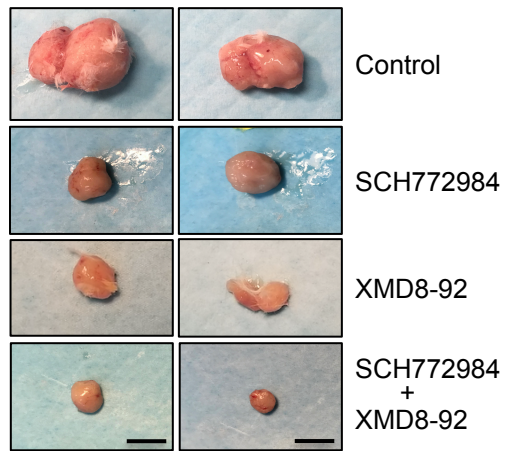

T

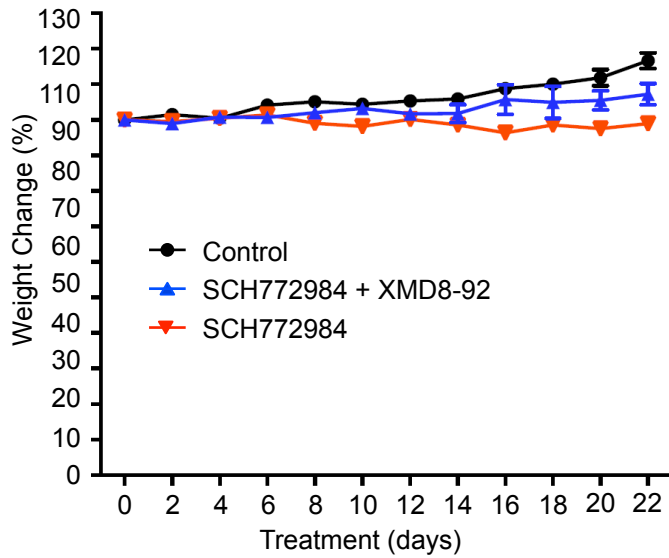

U

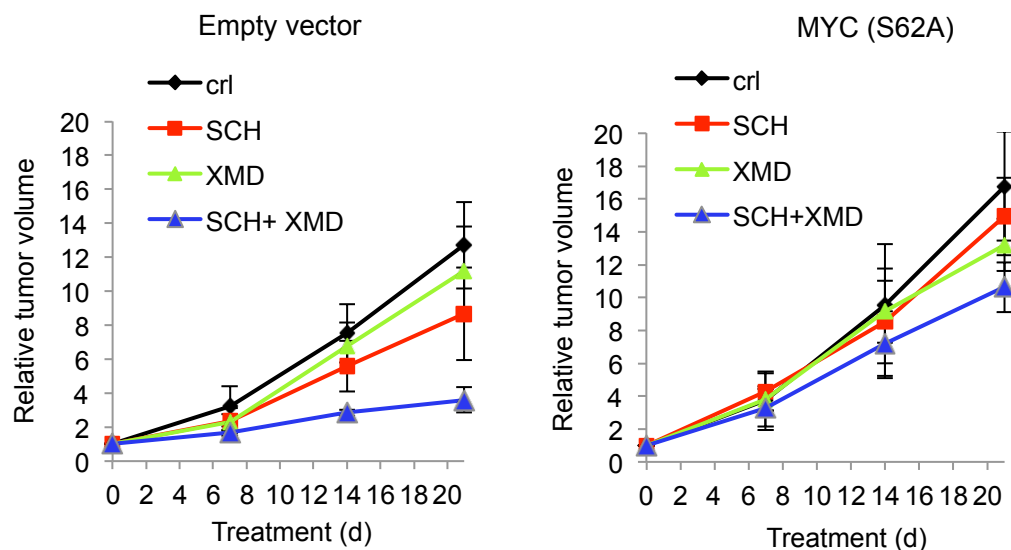

V

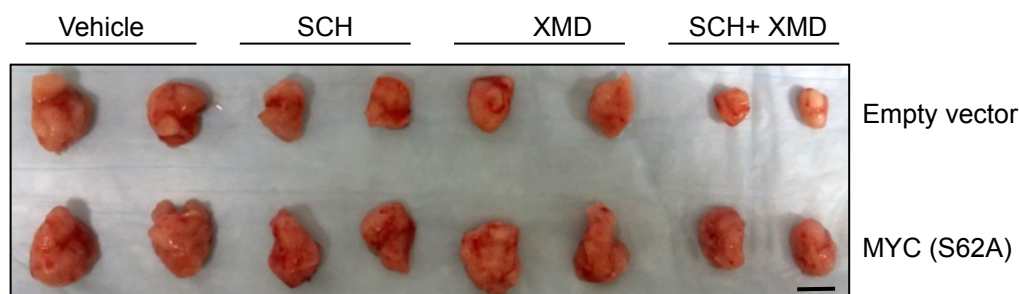

### Figure S7. EGFR/SRC-Dependent ERK5 Compensatory Mechanism Regulates MYC Protein Stability, Related to Figure 7.

(A) MIA PaCa-2 cells were treated with the ERK1/2i SCH772984 (100 nM), together with vehicle (DMSO), ERK5i XMD8-92 (2  $\mu$ M) or MEK5i BIX02188 (4  $\mu$ M) for 10 hr. Six hr prior to lysis and immunoprecipitation, cells were treated with MG132. ERK5 complexes were isolated and analyzed as described in Figure 7A.

(B) MIA PaCa-2 cells stably expressing the indicated WT or phospho-deficient MYC-FLAG proteins were transfected with *ERK5* siRNAs for 48 hr and protein levels were detected by immunoblotting.

(C) AsPC-1 cells were treated with SCH772984 (ERK1/2i) for the indicated times. Cell lysates were immunoblotted for total or phospho-specific antibodies (pEGFR, Y1068; pHER2 Y1248; pSRC, Y416).

(D) Panc10.05 cells treated for 1 hr with 1  $\mu$ M SCH772984 and then subjected to affinity capture of endogenous kinases, followed by quantitative mass spectrometry. The kinase abundance ratios (ERKi/DMSO control), as determined by LFQ quantitative analysis, were averaged from three independent experiments (left panel). A ratio  $\leq 0.7$  denotes decreased MIB binding while a ratio  $\geq 1.4$  denotes increased MIB binding.

(E) Immunoblotting with the indicated antibodies was done to assess ERK1/2 inhibition and MYC protein loss for the samples used in figure S7D.

(F) MIA PaCa-2 cells were treated for 12 hr with 200 nM ERK1/2i SCH772984 in the presence or absence of 500 nM inhibitors: pan-EGFRi poziotinib, EGFRi erlotinib, SRCi saracatinib or pan-FGFRi LY2874455. Immunoblotting of cell lysates was done with indicated antibodies to determine activation of pERK5 and pERK1/2.

(G) Human or mouse PDAC cell lines were exposed to dose-dependent drug sensitivity testing against 525 oncology-related compounds in the presence or absence of SCH772984 (100 nM). Cell viability was measured using CellTiter-Glo and drug responses were calculated as drug sensitivity scores (DSS). The deltaDSS values (DSS in the presence of ERK/MEK inhibitor – DSS in the absence of overlaid inhibitor) for each condition are plotted in the heatmap, where red signifies potential synergies and blue indicates negative interactions between the two drugs. Drugs where the deltaDSS remained between 5 and 5 for all four conditions were excluded from the heatmap.

(H) AsPC-1 cells were transiently transfected with NS or *ERK5* siRNA for 30 hr, then treated with vehicle (DMSO), SCH772984 (100 nM) or trametinib (2 nM) for an additional 8 hr. Where indicated, MG132 treatment was for 6 hr. Cell lysates were immunoblotted with the indicated antibodies. MYC phosphorylated at residue S62 (pMYC S62) was detected with phospho-specific antibody. Short (s) and long (l) exposures are shown for phosphorylated and total MYC proteins.

(I) MIA PaCa-2 cells stably expressing the GPS-MYC reporter were treated with either SCH772984 (100 nM) or XMD8-92 (2  $\mu$ M), or both, for 8 hr. EGFP and DsRed fluorescence was measured by FACS and EGFP/DsRed fluorescence ratio was plotted using Summit 5.2.

(J) PDAC cells were treated with SCH772984 (100 nM) or ERK5 inhibitors XMD8-92 (2  $\mu$ M) and BIX02189 (4  $\mu$ M) alone or in combination for 8 hr. Where indicated, MG132 treatment was for 6 hr. Blot analyses of total cell lysates were done with indicated antibodies.

(K) The indicated cell lines were treated with increasing doses of SCH772984 in combination with increasing doses of either XMD8-92 (ERK5i) or BIX02189 (MEK5i) for 96 hr, and proliferation was monitored by the CellTiter-Blue Cell Viability Assay. Bliss scores were calculated using Combenefit and heatmaps were generated using Graphpad Prism 7.

(L) PDAC cells were transfected with NS or *ERK5* siRNA, plated in 96 or 6 well plates and treated with SCH772985 as indicated. Quantitation of cell viability in 96-well plates, 96 hr after SCH772985 treatments (left panel). Data are presented as the mean of three replicates, error bars represent standard error of the mean. Clonogenic survival visualized by crystal violet staining, 10 days after treatment, 12-well plates (middle panel).  $GI_{50}$  values were calculated using Graphpad Prism 7 (right panel).

(M) PDAC cell lines were treated with the indicated concentrations of SCH772984, together with vehicle (DMSO), XMD8-92 (2  $\mu$ M), or BIX02189 (4  $\mu$ M) for 96 hr. Quantitation of cell viability, 96 hr after treatments (left panel). Data are presented as the mean of three replicates, error bars represent standard error of the mean. Ten days after treatment, clonogenic growth was visualized by staining with crystal violet in 12-well plates (middle panel).  $GI_{50}$  values were calculated using Graphpad Prism 7 (right panel).

(N) MIA PaCa-2 cells stably expressing empty vector, FLAG epitope-tagged WT or phospho-deficient MYC mutants were treated with the indicated concentrations of SCH772984, together with vehicle (DMSO), XMD8-92 (2  $\mu$ M), or BIX02189 (4  $\mu$ M) for 96 hr. Quantitation of cell viability, 96 hr after treatments (left panel). Data are presented as the mean of three replicates, error bars represent standard error of the mean. Ten days after treatment, clonogenic growth was visualized by staining with crystal violet in 12-well plates (middle panel).  $GI_{50}$  values were calculated using Graphpad Prism 7.

(O) AsPC-1 cells stably expressing empty vector, FLAG epitope-tagged WT or phospho-deficient MYC mutants were treated with the indicated concentrations of SCH772984, together with vehicle (DMSO), XMD8-92 (2  $\mu$ M), or BIX02189 (4  $\mu$ M) for 96 hr. Quantitation of cell viability 96 hr after treatments (left panel). Data are presented as the mean of three replicates, error bars represent standard error of the mean. Ten days after treatment, clonogenic growth was visualized by staining with crystal violet in 12-well plates (middle panel). GI50 values were calculated using Graphpad Prism 7.

(P) MIA PaCa-2 and AsPC-1 cells stably expressing empty vector, FLAG epitope-tagged WT or phospho-deficient MYC mutants were treated with SCH772984 (100 nM) or ERK5 inhibitor XMD8-92 alone or in combination for 8 hr. Blot analyses of total cell lysates were done with indicated antibodies.

(Q) Ki67 immunohistochemical staining of representative EMC1222 tumors from Figure 7F. Scale bar= 100  $\mu$ m.

(R-S) Immunocompromised (NSG) mice with the implanted *KRAS*-mutant PDX tumors AZ1013 (top) and AZ97 (bottom) were treated with SCH772984 (ERKi) alone or together with ERK5i XMD 8-92 for the indicated days (left panels). The relative tumor volume and standard error of the mean were graphed. Images of representative tumors are shown in the right panels. AZ97 PDX tumors have the following mutations: *KRAS*G12V, *TP53* p.R248Q, *SMAD4* p.Y131\* and *CDKN2A*. AZ1013 PDX tumors have the following mutations: *KRAS* G12D, *TP53* R248W, *NF1* I1186N, *KMT2C* R4541\*, *SMAD4* and *CDKN2A* deletions. Scale bar = 1 cm.

(T) Graph summarizing mouse weight change over days of drug treatment. The relative tumor volume and standard error of the mean were graphed.

(U) NOD *scid* mice inoculated subcutaneously with AsPC-1 cells stably infected with empty vector or encoding MYC S62A were treated with SCH772984 (ERKi) alone or together with XMD 8-92 (ERK5i) for the indicated days. The relative tumor volume and standard error of the mean were graphed.

(V) Images of representative tumors from Figure S7U. Scale bar =1 cm.

**Table S2. Oligonucleotides, Related to Star Methods**

|                                     |                        |                                                |
|-------------------------------------|------------------------|------------------------------------------------|
| NS siRNA oligo: 5'-XXXXXXXXXX-3'    | N/A                    | Thermo Fisher Sci. Cat# 4390843                |
| MYC siRNA oligo 1: 5'-XXXXXXXXXX-3' | AGACCUUCAUCAAAAACAUtt  | Thermo Fisher Sci. Cat# 4392420<br>ID# s9129   |
| MYC siRNA oligo 2: 5'-XXXXXXXXXX-3' | GAGCUAAAACGGAGCUUUUtt  | Thermo Fisher Sci. Cat# 4392420 ID# s9130      |
| Myc shRNA: 5'-XXXXXXXXXX-3'         | GAUGAUGACCGAGUUACUU    | ID# V3IMMMCG_12968867                          |
| NS shRNA:                           | N/A                    | Thermo Fisher Sci. Cat# VSC6584                |
| KRAS siRNA oligo 1                  | CUAUGGUCCUAGUAGGAAAtt  | Thermo Fisher Sci. Cat# 4390824<br>ID# s7939   |
| KRAS siRNA oligo 2                  | GCCUUGACGAUACAGCUAAtt  | Thermo Fisher Sci. Cat# 4390824<br>ID# s7940   |
| MYC RNA primer A:                   | 1214087 B2             | ID# Hs00153408_m1                              |
| MYC RNA primer B:                   | 1133740 A6             | ID# Hs00153408_m1                              |
| GAPDH                               |                        |                                                |
| ERK1 siRNA oligo 1:                 | GGACCGGAUGUUAACCUUtt   | Thermo Fisher Sci. Cat# 4457298<br>ID# s11141  |
| ERK1 siRNA oligo 2                  | UGAUGGAGACUGACCUGUAtt  | Thermo Fisher Sci. Cat# 4392420<br>ID# s230179 |
| ERK2 siRNA oligo 1                  | CAGGGUUCCUGACAGAAUAtt  | Thermo Fisher Sci. Cat# 4390824<br>ID# s11137  |
| ERK2 siRNA oligo 2:                 | CAACCAUCGAGCAAUGAAtt   | Thermo Fisher Sci. Cat# 4390824<br>ID# s11138  |
| FBXW7 siRNA oligo 1:                | GCAUAUGAUUUUAUGGUAAtt  | Thermo Fisher Sci. Cat# 4392420<br>ID# s30663  |
| FBXW7 siRNA oligo 2:                | GGGUUGUUAGUGGAGCAUAtt  | Thermo Fisher Sci. Cat# 4392420<br>ID# s30664  |
| FBW7 RNA primer                     | 1326276 B4             | ID# Hs00217794_m1                              |
| ERK5 siRNA oligo 1:                 | GCUGAACAUACAGUACUUCAtt | Thermo Fisher Sci. Cat# 4390824<br>ID# s11149  |
| ERK5 siRNA oligo 2:                 | GAGGAAUUCAUAAACCAGUtt  | Thermo Fisher Sci. Cat# 4392420<br>ID# s11150  |
| ERK5 siRNA oligo 3:                 | CCAUUGAUCUGACCCUGCAtt  | Thermo Fisher Sci. Cat# 4392420<br>ID# s11151  |
